# Supplementary material for: Deciphering SCN2A: A comprehensive review of rodent models of Scn2a dysfunction
Source: PubMed Central journal article supplement (PMC11601800), 2024-11-15
Supplement: NIHPP2411.10421v1-supplement-1.pdf [file NIHPP2411.10421v1-supplement-1.pdf]

| Model                                                       | Principle Paper               | Related Papers                                | Iteration of Conditional Model                                         |
|-------------------------------------------------------------|-------------------------------|-----------------------------------------------|------------------------------------------------------------------------|
| <b>Constitutive Haploinsufficient Mouse Models of SCN2A</b> |                               |                                               |                                                                        |
| <i>Scn2a +/-</i>                                            | Planells-Cases et al., 2000   | Planells-Cases et al., 2000                   |                                                                        |
|                                                             |                               | Mishra et al., 2017                           |                                                                        |
|                                                             |                               | Middleton et al., 2018                        |                                                                        |
|                                                             |                               | Ogiwara et al., 2018                          |                                                                        |
|                                                             |                               | Lena and Mantegazza 2019                      |                                                                        |
|                                                             |                               | Spratt et al., 2019                           |                                                                        |
|                                                             |                               | Tatsukawa et al., 2019                        |                                                                        |
|                                                             |                               | Miyamoto et al., 2019                         |                                                                        |
|                                                             |                               | Spratt et al., 2021                           |                                                                        |
|                                                             |                               | Indumathy et al., 2021                        |                                                                        |
|                                                             |                               | Tamura et al., 2022                           |                                                                        |
|                                                             |                               | Schamiloglu et al., 2023                      |                                                                        |
| Wang et al., 2024                                           |                               |                                               |                                                                        |
| Marcantonio et al., 2023                                    |                               |                                               |                                                                        |
| <i>Scn2a+/-; Kcna1-/-</i>                                   | Mishra et al., 2017           | Mishra et al., 2008<br>Indumathy et al., 2021 |                                                                        |
| <i>Scn2a+/-; Kcna1+/-</i>                                   |                               | Indumathy et al., 2021                        |                                                                        |
| <i>Nav1.2 adult</i>                                         |                               | Gazina et al., 2015                           |                                                                        |
| <i>Scn2a fl/+</i>                                           |                               | Shin et al., 2019                             |                                                                        |
| <i>Scn2a +/KI</i>                                           | Tamura et al., 2022           | Tamura et al., 2022                           |                                                                        |
| <b>Premature Stop Codon Models</b>                          |                               |                                               |                                                                        |
| <i>Scn2a R102X/+</i>                                        |                               | Ogiwara et al., 2018                          |                                                                        |
| <b>Conditional Mouse Models of Scn2a Haploinsufficiency</b> |                               |                                               |                                                                        |
| <i>Ei14::Scn2a +/-</i>                                      | Spratt et al., 2019           | Spratt et al., 2019                           | PV-Cre<br>SOM-Cre                                                      |
| <i>Scn2a +/fl</i>                                           |                               | Spratt et al., 2021                           | CaMKII $\alpha$ -Cre<br>EF1 $\alpha$ -Cre (Scn2a +/fl and Scn2a fl/fl) |
|                                                             |                               | Wang et al., 2024                             | Alpha6-Cre                                                             |
| <i>SCN2A ff</i>                                             |                               | Gould and Kim 2021                            | PDGFRA - Cre<br>Actin- Cre                                             |
| <i>Scn2a fl/+</i>                                           | Ogiwara et al., 2018          | Yamagata et al., 2017                         |                                                                        |
|                                                             |                               | Ogiwara et al., 2018                          | Vgat-Venus<br>Emx1-Cre<br>Vgat-Cre<br>Vgat-Venus                       |
|                                                             |                               | Tatsukawa et al., 2019                        | Emx1-Cre<br>Vgat-Cre                                                   |
|                                                             |                               | Miyamoto et al., 2019                         | Emx1-Cre<br>Vgat-Cre                                                   |
|                                                             |                               | Miyamoto et al., 2019                         | Trpc-Cre<br>Ntsr-Cre                                                   |
| <i>Scn2a fl/fl</i>                                          |                               | Suzuki et al., 2023                           | mPFC-Cre<br>VTA-Cre                                                    |
| <i>Scn2a +/KI</i>                                           |                               | Tamura et al., 2022                           | EF1 $\alpha$ -Cre                                                      |
| <i>Scn2a fl/fl</i>                                          |                               | Ma et al., 2022                               | SCN-Cre                                                                |
| <b>Additional Mouse Models of Scn2a Reduction</b>           |                               |                                               |                                                                        |
| <i>Scn2a :OB GC - shRNA</i>                                 |                               | Nunes and Kuner, 2018                         |                                                                        |
| <i>Scn2a<math>\Delta</math>1898/+</i>                       |                               | Wang et al., 2021                             |                                                                        |
| <i>Scn2a gtKO/gtKO</i>                                      | Eaton et al., 2021            | Eaton et al., 2021                            |                                                                        |
|                                                             |                               | Ma et al., 2022                               |                                                                        |
|                                                             |                               | Wu et al., 2024                               |                                                                        |
| <i>Scn2a ASO</i>                                            |                               | Li et al., 2023                               |                                                                        |
| <b>SCN2A Gain of Function Mouse Models</b>                  |                               |                                               |                                                                        |
| <i>Scn2a Q54</i>                                            | Kearney et al., 2001          | Kearney et al., 2001                          |                                                                        |
|                                                             |                               | MacDonald et al., 2004                        |                                                                        |
|                                                             |                               | Bergren et al., 2005                          |                                                                        |
|                                                             |                               | Bergren et al., 2009                          |                                                                        |
|                                                             |                               | Kile et al., 2008                             |                                                                        |
|                                                             |                               | Anderson et al., 2014                         |                                                                        |
|                                                             |                               | Kim et al., 2016                              |                                                                        |
|                                                             |                               | Calhoun et al., 2016                          |                                                                        |
|                                                             |                               | Hawkins & Kearney, 2016                       |                                                                        |
| Thompson et al., 2017                                       |                               |                                               |                                                                        |
| <i>Scn2a A263v /+</i>                                       |                               | Schattling et al., 2019                       |                                                                        |
| <i>Scn2a Q/+</i>                                            |                               | Li et al., 2021                               |                                                                        |
| <b>Other SCN2A Mouse Models</b>                             |                               |                                               |                                                                        |
| <i>Scn2a E/+</i>                                            | Echeveria-Cooper et al., 2022 | Echeveria-Cooper et al., 2022                 |                                                                        |
|                                                             |                               | Echeveria-Cooper et al., 2023                 |                                                                        |
|                                                             |                               | Echeveria-Cooper and Kearney, 2023            |                                                                        |

| Paper                                       | Model                            | Iteration of Conditional Model | Mice Age                                  | Social                                                                                                                                                                                                  | Learning/Memory                                                                                                                                                             | Motor                                                                                                                                                                                                                                                                                                                                                                                                                                                    | Repetitive Behaviors                            | Anxiety/Hyperactivity                                                                              | Olfaction                       | Seizures                                                                                                                               | Other                                                                                                                                                                                                                                                                                           |                                                                                                                                                                  |                                                                                                                                                                                                                                                                                                                                                                                        |  |
|---------------------------------------------|----------------------------------|--------------------------------|-------------------------------------------|---------------------------------------------------------------------------------------------------------------------------------------------------------------------------------------------------------|-----------------------------------------------------------------------------------------------------------------------------------------------------------------------------|----------------------------------------------------------------------------------------------------------------------------------------------------------------------------------------------------------------------------------------------------------------------------------------------------------------------------------------------------------------------------------------------------------------------------------------------------------|-------------------------------------------------|----------------------------------------------------------------------------------------------------|---------------------------------|----------------------------------------------------------------------------------------------------------------------------------------|-------------------------------------------------------------------------------------------------------------------------------------------------------------------------------------------------------------------------------------------------------------------------------------------------|------------------------------------------------------------------------------------------------------------------------------------------------------------------|----------------------------------------------------------------------------------------------------------------------------------------------------------------------------------------------------------------------------------------------------------------------------------------------------------------------------------------------------------------------------------------|--|
| <b>Planelis-Cases Scn2a +/- Mouse Model</b> |                                  |                                |                                           |                                                                                                                                                                                                         |                                                                                                                                                                             |                                                                                                                                                                                                                                                                                                                                                                                                                                                          |                                                 |                                                                                                    |                                 |                                                                                                                                        |                                                                                                                                                                                                                                                                                                 |                                                                                                                                                                  |                                                                                                                                                                                                                                                                                                                                                                                        |  |
| Mishra et al., 2017                         | Scn2a +/- (Planelis-Cases model) |                                | 2 - 3 months                              |                                                                                                                                                                                                         |                                                                                                                                                                             |                                                                                                                                                                                                                                                                                                                                                                                                                                                          |                                                 |                                                                                                    |                                 | -ND in seizure threshold or epileptiform activity<br>-ND in cardiac activity with EEG-ECG recordings<br>-ND in latency to GTC seizures | -ND in brain-heart association                                                                                                                                                                                                                                                                  | RED = Decrease<br>BLUE = Increase/Altered<br>ND = No Difference                                                                                                  |                                                                                                                                                                                                                                                                                                                                                                                        |  |
| Middleton et al., 2018 (males only)         |                                  |                                | 4 - 6 months                              |                                                                                                                                                                                                         | -Delayed learning in spatial working memory task<br>-Slower learning in Barnes maze                                                                                         |                                                                                                                                                                                                                                                                                                                                                                                                                                                          |                                                 |                                                                                                    |                                 |                                                                                                                                        |                                                                                                                                                                                                                                                                                                 | -Decrease in the peak firing rate of piriform cortex during SPW-R events<br>-Lower strength of assembly during SPW-Rs<br>-Truncated hippocampal replay sequences | OFT = Open Field Test<br>EPM = Elevated Plus Maze<br>FST = Forced Swim Test<br>TST = Tail Suspension Test<br>USV = Ultrasonic Vocalization<br>PPI = Prepulse Inhibition<br>mPFC = Medial Prefrontal Cortex<br>ECoG = Electroencephalogram<br>PTZ = Pentyleneetetrazol<br>FSI = fast-spiking interneurons<br>EPSCs = excitatory postsynaptic currents<br>VOR = Vestibular Ocular Reflex |  |
| Ogiwara et al., 2018                        |                                  |                                | 6 - 11 weeks                              |                                                                                                                                                                                                         |                                                                                                                                                                             |                                                                                                                                                                                                                                                                                                                                                                                                                                                          |                                                 |                                                                                                    |                                 |                                                                                                                                        | -ND in susceptibility to kainic acid induced seizures<br>-Frequently abnormal ECoG recordings with absence-like discharges with SWDs<br>-Higher maximum amplitude and spike numbers during a seizure episode<br>-Shorter latency to have absence seizure-like immobility when injected with PTZ |                                                                                                                                                                  | -Higher prevalence and incidence of epileptiform discharges in mPFC<br>-Impaired excitatory neural activity                                                                                                                                                                                                                                                                            |  |
| Lena and Mantegazza, 2019 (males only)      |                                  |                                | Juvenile: P22 - P44                       | -Decreased amount and length of USVs produced<br>-Decreased social interaction in the first two minutes of reciprocal social interaction test                                                           | -Slight decrease of spontaneous alternations in Y maze<br>-Decreased preference for novel object in NOR task                                                                | -Increased acquired motor learning on rotarod                                                                                                                                                                                                                                                                                                                                                                                                            | Increased grooming<br>-Increased marble burying | -Reduced anxiety in EPM<br>-Reduced anxiety in OFT<br>-ND in locomotion in OFT                     | -ND in odor discrimination task |                                                                                                                                        |                                                                                                                                                                                                                                                                                                 |                                                                                                                                                                  | -Decreased immobility in TST                                                                                                                                                                                                                                                                                                                                                           |  |
|                                             |                                  |                                | Adult: P60 - P95                          | -Decreased amount and length of USVs produced<br>-ND in reciprocal social interaction test                                                                                                              | -ND in number of visits or spontaneous alternations in Y maze<br>-ND in preference for novel object in NOR task<br>-Slightly slower acquisition latency in Barnes maze test | -ND in motor learning in rotarod                                                                                                                                                                                                                                                                                                                                                                                                                         | -ND in grooming<br>-ND in marble burying        | -ND in anxiety in EPM<br>-ND in anxiety in OFT<br>-ND in locomotion in OFT                         | -ND in odor discrimination task |                                                                                                                                        |                                                                                                                                                                                                                                                                                                 |                                                                                                                                                                  | -Slight decrease in immobility in minutes four to six of TST                                                                                                                                                                                                                                                                                                                           |  |
| Spratt et al., 2019                         |                                  |                                | Age not reported                          | -Females showed no preference for novel stimuli in two-chamber social task                                                                                                                              | -Males had slightly impaired reversal learning water T-maze<br>-ND in spontaneous alternation assay                                                                         | -ND in rotarod<br>-ND in balance beam                                                                                                                                                                                                                                                                                                                                                                                                                    | -ND in grooming<br>-ND in nesting assay         | -Females had reduced anxiety in EPM<br>-ND in OFT                                                  |                                 |                                                                                                                                        |                                                                                                                                                                                                                                                                                                 |                                                                                                                                                                  |                                                                                                                                                                                                                                                                                                                                                                                        |  |
| Tatsuwaka et al., 2019 (males only)         |                                  |                                | P6 for USV +8 - 31 weeks for other assays | -Increased sociability in e-chamber assay<br>-Slight dominant behavior in tube test<br>-Deficit in social approach toward stranger mice in resident-intruder test<br>-ND in social communication in USV | -Enhanced fear conditioning retention<br>-Impaired extinction of fear-related memory                                                                                        | -Deficient motor coordination in rotarod                                                                                                                                                                                                                                                                                                                                                                                                                 | -Increased rearing in OFT                       | -Reduced anxiety in EPM<br>-Reduced anxiety in OFT<br>-Increased anxiety in light/dark assay       |                                 |                                                                                                                                        |                                                                                                                                                                                                                                                                                                 |                                                                                                                                                                  | -Higher immobility in FST<br>-Immobility in TST<br>-ND in PPI<br>-Increased activity in the gamma band in the mPFC                                                                                                                                                                                                                                                                     |  |
| Miyamoto et al., 2019                       |                                  |                                | > 8 weeks                                 |                                                                                                                                                                                                         |                                                                                                                                                                             |                                                                                                                                                                                                                                                                                                                                                                                                                                                          |                                                 |                                                                                                    |                                 |                                                                                                                                        |                                                                                                                                                                                                                                                                                                 | -Have SWDs during behavioral quiescence                                                                                                                          | -Slight decrease in EPSCs in FSIs                                                                                                                                                                                                                                                                                                                                                      |  |
| Indumathy et al., 2021                      |                                  |                                | 28 - 34 days                              | -ND in sociability in three-chamber assay<br>-Decreased preference for novel stranger mice in social novelty assay                                                                                      |                                                                                                                                                                             | -Reduced marble burying<br>-Increased grooming                                                                                                                                                                                                                                                                                                                                                                                                           |                                                 |                                                                                                    |                                 |                                                                                                                                        |                                                                                                                                                                                                                                                                                                 |                                                                                                                                                                  | -ND in nestlet shredding                                                                                                                                                                                                                                                                                                                                                               |  |
| Schamiloglu et al., 2023                    |                                  |                                | P54 - P119                                |                                                                                                                                                                                                         |                                                                                                                                                                             | -ND in learning the standard dynamic foraging task or variations of the assay where mice are head-fixed, the block length varies, there is reward optimization, or the cues vary<br>-Slight increase in frequency to pick higher reward side in foraging assay<br>-Males had inflexible choice behavior during mid-block performance in the unpredictable paradigm of the dynamic foraging assay<br>-ND in intertrial interval in dynamic foraging assay |                                                 |                                                                                                    |                                 |                                                                                                                                        |                                                                                                                                                                                                                                                                                                 |                                                                                                                                                                  | -Spontaneous behavioral seizures in four of twenty five mice at the end of a day's training and one of the four mice died                                                                                                                                                                                                                                                              |  |
| Wang et al., 2024                           |                                  |                                | P60 - P90                                 |                                                                                                                                                                                                         |                                                                                                                                                                             |                                                                                                                                                                                                                                                                                                                                                                                                                                                          |                                                 |                                                                                                    |                                 |                                                                                                                                        |                                                                                                                                                                                                                                                                                                 |                                                                                                                                                                  | -Consistently elevated VOR gain in different rotation frequencies<br>-Decreased Purkinje cell firing rate                                                                                                                                                                                                                                                                              |  |
|                                             |                                  |                                | Juvenile: P21 - P44                       | -Higher sociability in e-chamber assay<br>-ND in social novelty in three-chamber assay                                                                                                                  | -ND in preference for displaced object in novel object recognition task<br>-Lower entries into the of the Y maze<br>-Increased decision-making latency in Y maze            | -Higher latency to fall on day one of rotarod                                                                                                                                                                                                                                                                                                                                                                                                            | -ND in grooming<br>-ND in marble burying        | -ND in EPM locomotion<br>-Reduced anxiety in EPM<br>-ND in anxiety in OFT<br>-ND in OFT locomotion | -ND in odor discrimination task |                                                                                                                                        |                                                                                                                                                                                                                                                                                                 |                                                                                                                                                                  | -ND in latency of reaction to stimuli in hotplate assay<br>-ND in latency before withdrawal in coldplate assay                                                                                                                                                                                                                                                                         |  |

| Paper                                                             | Model                                                     | Iteration of Conditional Model | Mice Age                       | Social                                                                                                                                                                        | Learning/Memory                                                                                                                                                                                   | Motor                                                                                                                                                                                                                    | Repetitive Behaviors                                                                                                                                             | Anxiety/Hyperactivity                                                                                                                                                           | Olfaction                                                               | Seizures                                                                                                                 | Other                                                                                                                                                                                                                                                                                                                                                      |
|-------------------------------------------------------------------|-----------------------------------------------------------|--------------------------------|--------------------------------|-------------------------------------------------------------------------------------------------------------------------------------------------------------------------------|---------------------------------------------------------------------------------------------------------------------------------------------------------------------------------------------------|--------------------------------------------------------------------------------------------------------------------------------------------------------------------------------------------------------------------------|------------------------------------------------------------------------------------------------------------------------------------------------------------------|---------------------------------------------------------------------------------------------------------------------------------------------------------------------------------|-------------------------------------------------------------------------|--------------------------------------------------------------------------------------------------------------------------|------------------------------------------------------------------------------------------------------------------------------------------------------------------------------------------------------------------------------------------------------------------------------------------------------------------------------------------------------------|
| Marcantonio et al., 2023 (females only)                           |                                                           |                                | Adult: >P60                    | -Higher sociability in three-chamber assay<br>-Altered interaction with novel mouse in three-chamber assay                                                                    | -ND in preference for left in NOR task<br>-Lower entries into the three arms of Y maze -<br>Increased decision-making latency in Y maze<br>-Reduced percent of spontaneous alternations in Y maze | -ND in latency to fall in rotarod                                                                                                                                                                                        | -ND in grooming<br>ND in marble burying                                                                                                                          | -ND in EPM locomotion -<br>ced anxiety in EPM<br>-ND in anxiety in OFT<br>ND in OFT locomotion                                                                                  | -ND in odor discrimination task                                         |                                                                                                                          | -ND in latency of reaction to stimuli in coldplate assay<br>-Decreased latency before withdrawal in coldplate                                                                                                                                                                                                                                              |
| <b>Other Constitutive Haploinsufficient Mouse Models Behavior</b> |                                                           |                                |                                |                                                                                                                                                                               |                                                                                                                                                                                                   |                                                                                                                                                                                                                          |                                                                                                                                                                  |                                                                                                                                                                                 |                                                                         |                                                                                                                          |                                                                                                                                                                                                                                                                                                                                                            |
| Mishra et al., 2017                                               | <i>Scn2a<sup>+/-</sup>;</i><br><i>Kcna1<sup>-/-</sup></i> |                                | 2-3 months                     |                                                                                                                                                                               |                                                                                                                                                                                                   |                                                                                                                                                                                                                          |                                                                                                                                                                  |                                                                                                                                                                                 |                                                                         | <i>Scn2a<sup>+/-</sup></i> decreases spontaneous seizure duration in <i>Kcna1<sup>-/-</sup></i> mice                     | Nav1.2 reduction does not ameliorate cardiac phenotypes in <i>Kcna1<sup>-/-</sup></i> mice.                                                                                                                                                                                                                                                                |
| Indumathy et al., 2021                                            | <i>Scn2a<sup>+/-</sup>;</i><br><i>Kcna1<sup>+/-</sup></i> |                                | 28-34 days                     | -ND in sociability -<br>Reduced social novelty sniffing<br>ND in sociability or social novelty                                                                                |                                                                                                                                                                                                   |                                                                                                                                                                                                                          | -Reduced nestlet shredding and marble burying<br>-ND in grooming and nestlet shredding<br>-Reduced marble burying                                                |                                                                                                                                                                                 |                                                                         |                                                                                                                          |                                                                                                                                                                                                                                                                                                                                                            |
| Gazina et al., 2015 (males only)                                  | <i>Nav1.2 adult</i>                                       |                                | 53 days >=                     | -ND in social interaction<br>-16x more likely to jump out of social interaction box                                                                                           | ND in memory and spatial learning on Y-maze and Morris water maze                                                                                                                                 | ND on rotarod, locomotion or in grip strength                                                                                                                                                                            |                                                                                                                                                                  | -ND in OFT or Light-Dark box<br>Reduced anxiety in EPM                                                                                                                          |                                                                         | Spontaneous seizures<br>- More susceptible to PTZ-induced seizures                                                       | ND in thermal pain response, acoustic startle, PPI, or weight                                                                                                                                                                                                                                                                                              |
| Shin et al., 2019 (males only)                                    | <i>Scn2a fl+</i>                                          |                                | 2-4 months<br>4 days - 3 weeks | -ND social approach and communication -<br>Increased direct social interaction<br>-ND in number and duration of USVs<br>-Slight increase direct social interaction            | -Reduced Spatial learning and memory on Morris water maze<br>-Increased Fear memory                                                                                                               | ND on Rotarod<br>-ND in locomotion in novel environments -<br>Decreased locomotion in familiar environments                                                                                                              | ND in grooming and rearing behaviors                                                                                                                             | -ND in anxiety for OFT, EPM and Light-Dark box<br>Mild light induced hypoactivity                                                                                               |                                                                         | Spontaneous seizures<br>-ND in susceptibility to PTZ-induced seizures                                                    | ND for novel object recognition<br>ND in mother attachment behaviors                                                                                                                                                                                                                                                                                       |
| <b>Hypomorphic Scn2a Mouse Model Behavior</b>                     |                                                           |                                |                                |                                                                                                                                                                               |                                                                                                                                                                                                   |                                                                                                                                                                                                                          |                                                                                                                                                                  |                                                                                                                                                                                 |                                                                         |                                                                                                                          |                                                                                                                                                                                                                                                                                                                                                            |
| Wang et al., 2021                                                 | <i>Scn2a Δ1898/+</i>                                      |                                | >= 30 to 44 days               | -Males displayed increased social interaction with novel mouse in 3-chamber<br>- After repeat exposure to the same mouse, males, still displayed increased social interaction |                                                                                                                                                                                                   | ND in general locomotion                                                                                                                                                                                                 | ND in time spent grooming                                                                                                                                        | ND in OFT<br>- Reduced anxiety-like behaviors on EPM                                                                                                                            |                                                                         |                                                                                                                          |                                                                                                                                                                                                                                                                                                                                                            |
| Eaton et al., 2021                                                | <i>Scn2a gKO;gKO (AKA Scn2a Trap)</i>                     |                                | 3 to 5 months                  |                                                                                                                                                                               | -Decreased novel object exploration in novel object<br>-Decreased number of entries to, duration in, and preference for the novel arm of Y-maze                                                   | -ND activity, tail posture, limb grasping, extension, shivering reflex<br>-Decreased grip ability in SHIPRA<br>-Females traveled longer<br>-Decrease in distance traveled in OFT<br>-Performed with increased brightness | -Decreased overall nest building<br>-Decreased quality of nests built<br>-Increased grooming<br>-Increased marble burying<br>-Slightly increased induced digging | -Increased anxiety-like behavior in low and bright light OFT<br>-ND freezing behavior in low light OFT<br>-Increased freezing in OFT performed with high intensity luminescence | -ND overall odor discrimination<br>Increased in time for discrimination |                                                                                                                          | Increased water and food intake<br>-Increased frequency of fecal boli in males<br>-Lower body position rating, less trunk curl and postural reflex when held by SHIPRA<br>-Decreased tolerance for heat and cold temperatures on thermal/cold plate assay<br>-ND for dynamic hot plate<br>Increased startle response<br>-Decreased startle response in PPI |
| Ma et al., 2022                                                   |                                                           |                                | > 6 weeks                      |                                                                                                                                                                               |                                                                                                                                                                                                   | Impairment of wheel-running activity in light-dark conditions                                                                                                                                                            |                                                                                                                                                                  |                                                                                                                                                                                 |                                                                         |                                                                                                                          | Abnormal sleep patterns                                                                                                                                                                                                                                                                                                                                    |
| Wu et al., 2024                                                   |                                                           |                                | 3 to 4 months                  |                                                                                                                                                                               | Impaired learning and memory on Morris water maze and Y-maze                                                                                                                                      |                                                                                                                                                                                                                          |                                                                                                                                                                  |                                                                                                                                                                                 |                                                                         |                                                                                                                          |                                                                                                                                                                                                                                                                                                                                                            |
| <b>Conditional and other Mouse Models of Scn2a Insufficiency</b>  |                                                           |                                |                                |                                                                                                                                                                               |                                                                                                                                                                                                   |                                                                                                                                                                                                                          |                                                                                                                                                                  |                                                                                                                                                                                 |                                                                         |                                                                                                                          |                                                                                                                                                                                                                                                                                                                                                            |
| Wang et al., 2024                                                 | <i>Scn2a fl/fl</i>                                        | Alpha6-Cre                     | 60 to 90 days                  |                                                                                                                                                                               |                                                                                                                                                                                                   |                                                                                                                                                                                                                          |                                                                                                                                                                  |                                                                                                                                                                                 |                                                                         |                                                                                                                          | Altered VOR                                                                                                                                                                                                                                                                                                                                                |
| Tatsukawa et al., 2019                                            | <i>Scn2a fl/+</i>                                         | Emx1-Cre                       | 8 to 9 weeks (Male Only)       |                                                                                                                                                                               |                                                                                                                                                                                                   | Increased rearing in OFT                                                                                                                                                                                                 |                                                                                                                                                                  | -Increased time in center of OFT<br>-Trend of entering open arms of EPM more                                                                                                    |                                                                         |                                                                                                                          |                                                                                                                                                                                                                                                                                                                                                            |
|                                                                   |                                                           | Vgat-Cre                       |                                |                                                                                                                                                                               | ND in locomotion or rearing                                                                                                                                                                       |                                                                                                                                                                                                                          | -ND OFT<br>Reduced anxiety-like behaviors on EPM                                                                                                                 |                                                                                                                                                                                 |                                                                         |                                                                                                                          |                                                                                                                                                                                                                                                                                                                                                            |
| Miyamoto et al., 2019                                             | <i>Scn2a fl/fl</i>                                        | Emx1-Cre                       | >= 8 weeks                     |                                                                                                                                                                               |                                                                                                                                                                                                   |                                                                                                                                                                                                                          |                                                                                                                                                                  |                                                                                                                                                                                 |                                                                         | -SWDs present during behavioral quiescence<br>-Inactivation of the CPU or thalamus by muscimol injection suppresses SWDs |                                                                                                                                                                                                                                                                                                                                                            |
|                                                                   |                                                           | Vgat-Cre                       |                                |                                                                                                                                                                               |                                                                                                                                                                                                   |                                                                                                                                                                                                                          |                                                                                                                                                                  |                                                                                                                                                                                 |                                                                         | No spontaneous SWDs                                                                                                      |                                                                                                                                                                                                                                                                                                                                                            |
|                                                                   |                                                           | Trpc-Cre                       |                                |                                                                                                                                                                               |                                                                                                                                                                                                   |                                                                                                                                                                                                                          |                                                                                                                                                                  |                                                                                                                                                                                 |                                                                         | Spontaneous SWDs                                                                                                         |                                                                                                                                                                                                                                                                                                                                                            |
| Ma et al., 2022                                                   | <i>Scn2a fl/fl</i>                                        | Ntsr-Cre                       | 3-5 months                     |                                                                                                                                                                               |                                                                                                                                                                                                   |                                                                                                                                                                                                                          |                                                                                                                                                                  |                                                                                                                                                                                 |                                                                         | No spontaneous SWDs                                                                                                      | Sleep Disturbances                                                                                                                                                                                                                                                                                                                                         |
| Suzuki et al., 2023                                               | <i>Scn2a fl/fl</i>                                        | mPFC-Cre                       | 18 to 19 weeks                 | Increased sociability in three chamber social approach                                                                                                                        |                                                                                                                                                                                                   | -Less distance traveled in three chamber social assay<br>-Less distance travelled and fewer rearing events in OFT                                                                                                        |                                                                                                                                                                  | Increased anxiety in OFT                                                                                                                                                        |                                                                         |                                                                                                                          | Reduced PPI                                                                                                                                                                                                                                                                                                                                                |
|                                                                   |                                                           | VTA-Cre                        | 11- 13 weeks                   | ND sociability in 3 chamber social approach                                                                                                                                   |                                                                                                                                                                                                   | Reduced rearing in OFT                                                                                                                                                                                                   |                                                                                                                                                                  | ND OFT                                                                                                                                                                          |                                                                         |                                                                                                                          | Increased percentage of PPI of startle response to 120 dB sound with 74 or 78 dB prepulse                                                                                                                                                                                                                                                                  |
| Nunes and Kuner, 2018                                             | <i>Scn2a -OB GC-shRNA</i>                                 |                                | 49 to 63 days                  |                                                                                                                                                                               |                                                                                                                                                                                                   |                                                                                                                                                                                                                          |                                                                                                                                                                  |                                                                                                                                                                                 | Reduced speed in odor discrimination                                    |                                                                                                                          |                                                                                                                                                                                                                                                                                                                                                            |

| Paper           | Model     | Iteration of Conditional Model | Mice Age   | Social                                                                       | Learning/Memory | Motor                       | Repetitive Behaviors            | Anxiety/Hyperactivity                                                                             | Olfaction | Seizures                                                                                               | Other |
|-----------------|-----------|--------------------------------|------------|------------------------------------------------------------------------------|-----------------|-----------------------------|---------------------------------|---------------------------------------------------------------------------------------------------|-----------|--------------------------------------------------------------------------------------------------------|-------|
| Li et al., 2023 | Scn2a ASO |                                | 2-3 months | -Impaired social approach<br>- Increased social avoidance in 3-chamber assay |                 | Increased locomotion in OFT | Impaired nest building behavior | -Decreased anxiety and ability to assess risk in EPM<br>- Increased anxiety-like behaviors in OFT |           | -No spontaneous seizures or detectable ictal features<br>- Augmented seizure response to PTZ treatment |       |
